# Supplementary material
Source: publisher figshare collection journal article supplement (https://tandf.figshare.com/articles/dataset/_/13272872)
Supplement: Supplementary file 1 [file 1]

# eFigure 3a: Person-Item Map – Subset of Items (Analysis #8: Removal of Pain, Shivering, Vomiting, Agitation, Lightheadedness, Headache Items)

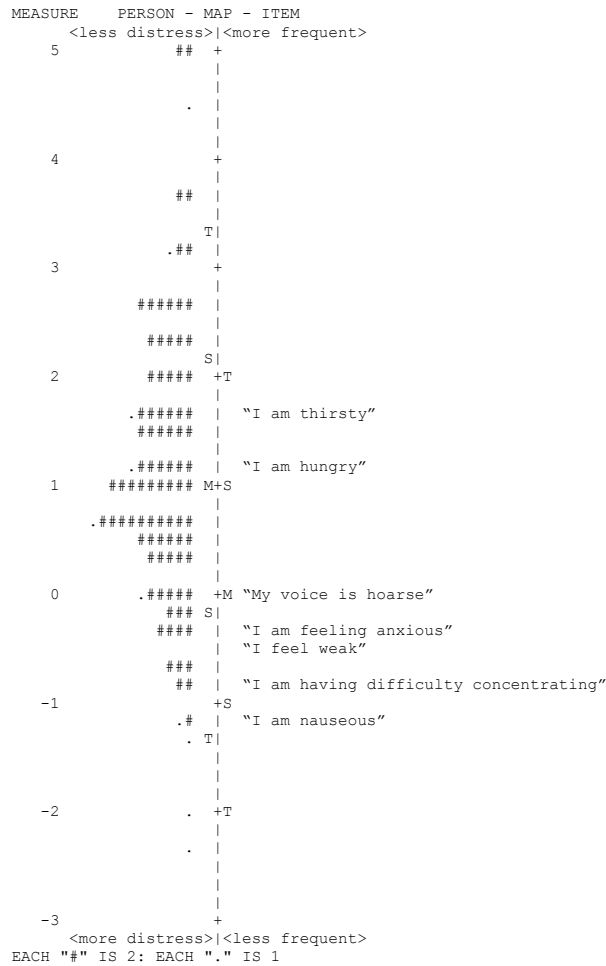

# eFigure 3b: Person-Item Map – Subset of Items (Analysis #9: Removal of Pain, Shivering, Vomiting, Agitation, Lightheadedness, Difficulty Concentrating Items)

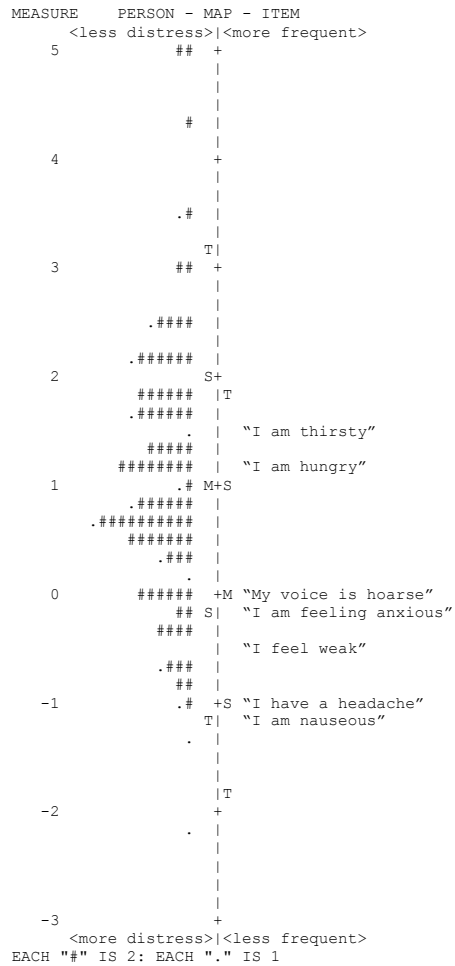

```
MEASURE      PERSON - MAP - ITEM
<less distress>|<more frequent>
5            ## +
              |
              . |
              |
              |
4            +
              |
              .# |
              T|
              .## |
3            +
              |
              ##### |
              ##### |
              . S |
2            .##### +T
              .
              ##### "I am thirsty"
              #####
              ##
              .##### "I am hungry"
1            .##### M+S
              #####
              .###
              .####
              .
0            .##### +M "My voice is hoarse"
              # S|
              ##### "I am feeling anxious"
              ##### "I feel weak"
              ###
              .##
-1           +S "I am feeling lightheaded/dizzy"
              # |
              . T|
              .
              |
-2           +T
              |
              .
              |
              |
-3           +
              |
              <more distress>|<less frequent>
EACH "##" IS 2: EACH "." IS 1
```

# eFigure 3d: Person-Item Map – Subset of Items (Analysis #12: Removal of Pain, Shivering, Vomiting, Anxiety, Lightheadedness, Weakness Items)

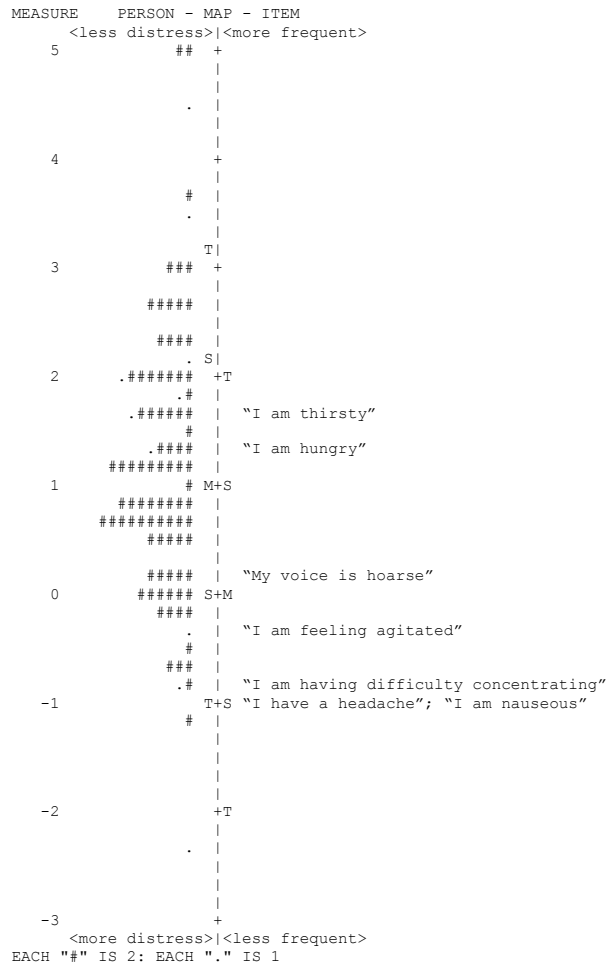

**eFigure 3e: Person-Item Map – Subset of Items (Analysis #13: Removal of Pain, Shivering, Vomiting, Anxiety, Lightheadedness, Agitation Items)**

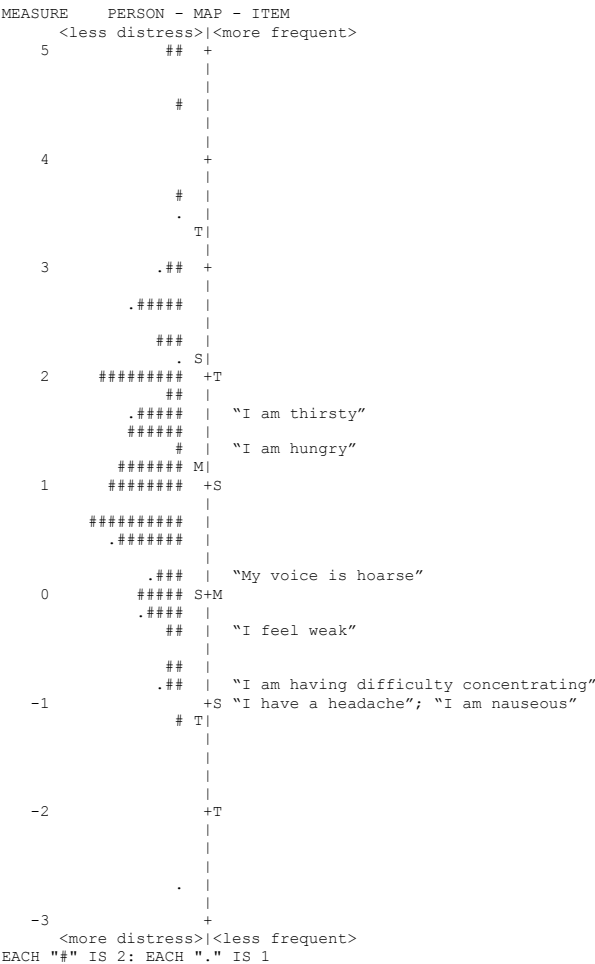

```

MEASURE      PERSON  - MAP - ITEM
      5      <less distress>|<more frequent>
              ##+
              |
              #
              |
      4      +
              #
              .
              |
              T|
      3      +
              ###
              |
              .#####
              |
              T
      2      .#### S+
              ##
              ##### "I am thirsty"
              #
              ##
              ##### "I am hungry"
      1      M+S
              #####
              .#####
              .#####
              #
      0      .#### S+M "My voice is low"
              #####
              .
              .###
              |
              ## "I am having a headache"
      -1     .# S+ "I have a headache"
              | T| "I am nauseous"
              |
      -2     +
              |
              T
              |
      -3     .
              +
              <more distress>|<less frequent>
EACH "#" IS 2: EACH "." IS 1

```
