# Supplementary material
Source: publisher figshare collection journal article supplement (https://tandf.figshare.com/articles/dataset/_/13272872)

**eFigure 2a: Person-Item Map – Subset of Items (Analysis #2: Removal of Vomiting Item)**

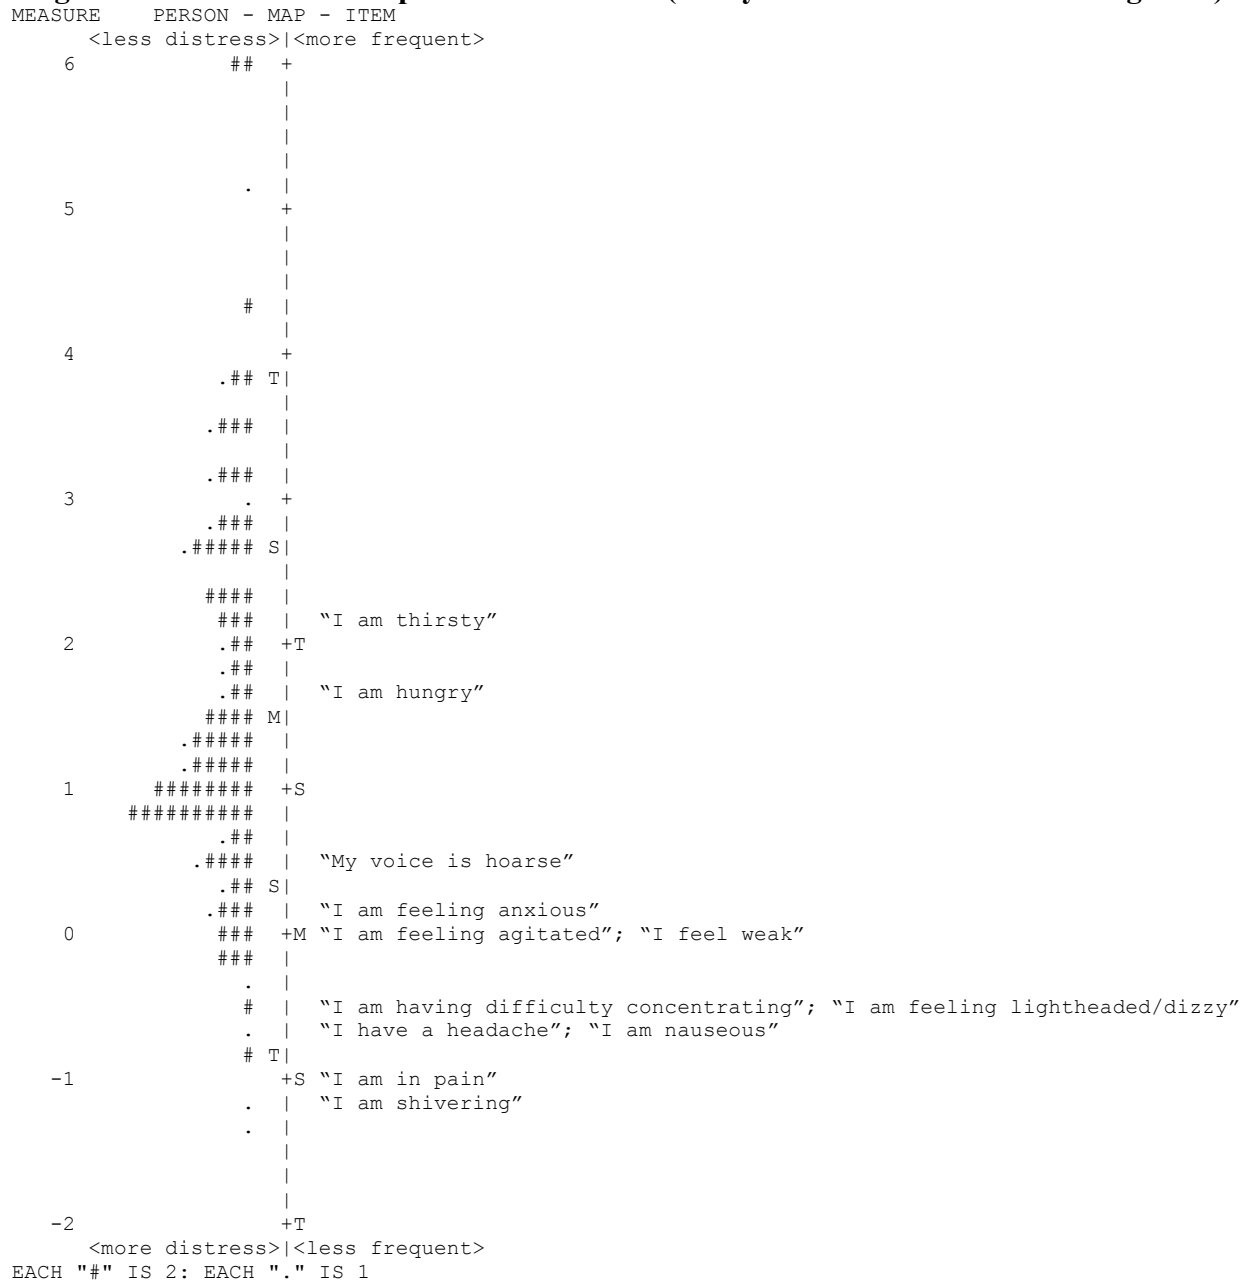



# eFigure 2c: Person-Item Map – Subset of Items (Analysis #4: Removal of Pain, Shivering, Vomiting, Agitation, Headache Items)

MEASURE PERSON - MAP - ITEM

<less distress>|<more frequent>

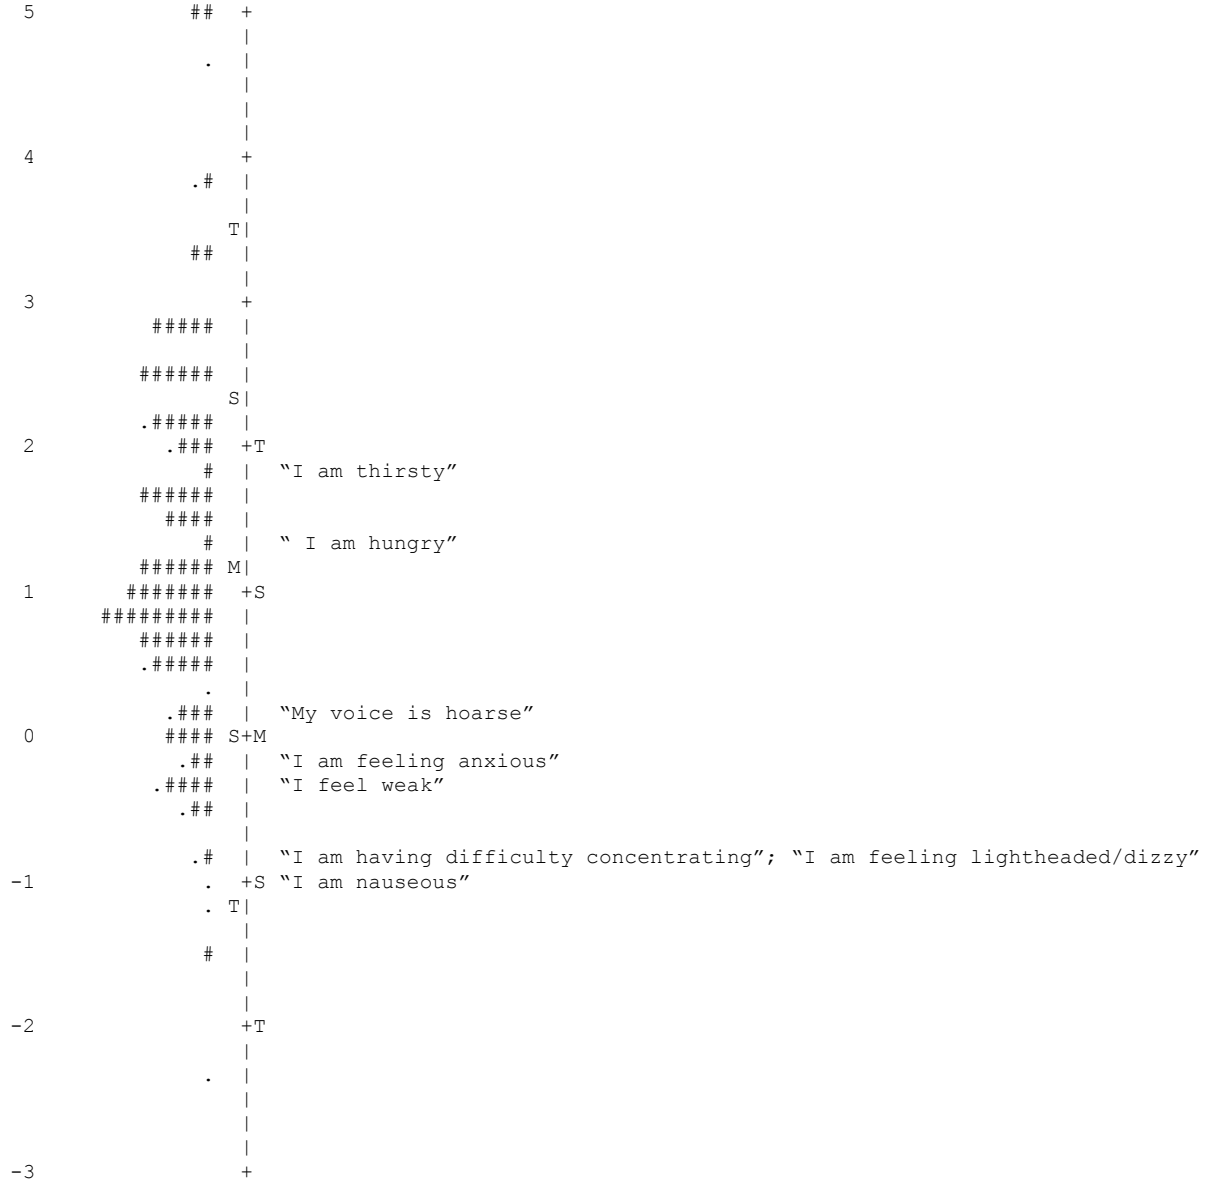

<more distress>|<less frequent>

EACH "#" IS 2: EACH "." IS 1

```

MEASURE      PERSON - MAP      ITEM
<less distress>|<more frequent>
5            ## +
            . |
            | |
            | |
            | |
4            .# +
            | |
            T|
            ## |
            | |
            | |
3            .#### +
            | |
            .##### |
            . |
            ##### S|
            . |
2            .#### +T
            .##### | "I am thirsty"
            . |
            .### | "I am hungry"
            ##### |
            .# M|
1            .### +S
            .##### |
            .#### |
            ##### |
            . |
            .### | "My voice is hoarse"
0            .### S+M
            .### |
            .### | "I am feeling agitated"; "I feel weak"
            ## |
            .# | "I am having difficulty concentrating"; "I am feeling lightheaded/dizzy"
-1            .# +S
            T| "I am nauseous"
            # |
            | |
            | |
            | |
-2            +T
            . |
            | |
            | |
            | |
-3            +
            <more distress>|<less frequent>
EACH "#" IS 2: EACH "." IS 1

```

## eFigure 2e: Person-Item Map – Subset of Items (Analysis #6: Removal of Pain, Shivering, Vomiting, Agitation, Lightheadedness Items)

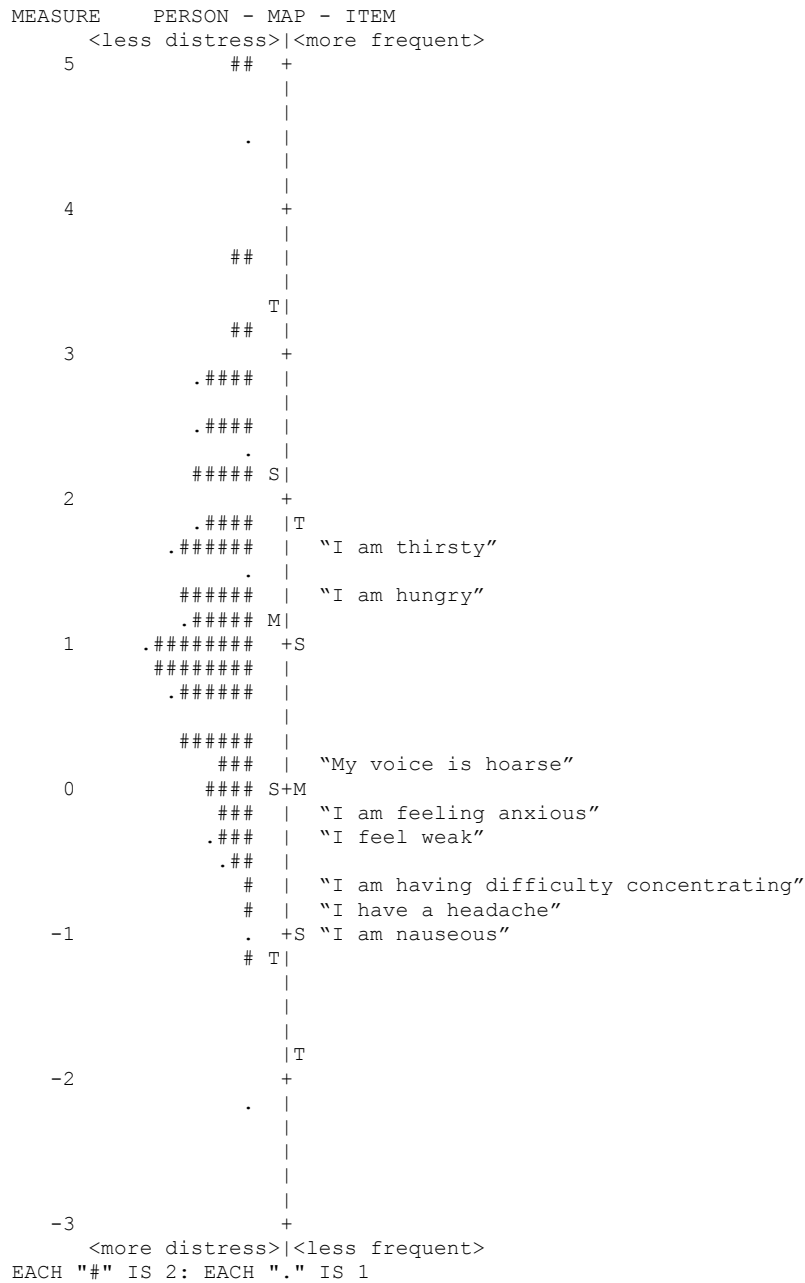

## eFigure 2f: Person-Item Map – Subset of Items (Analysis #7: Removal of Pain, Shivering, Vomiting, Anxiety, Lightheadedness Items)

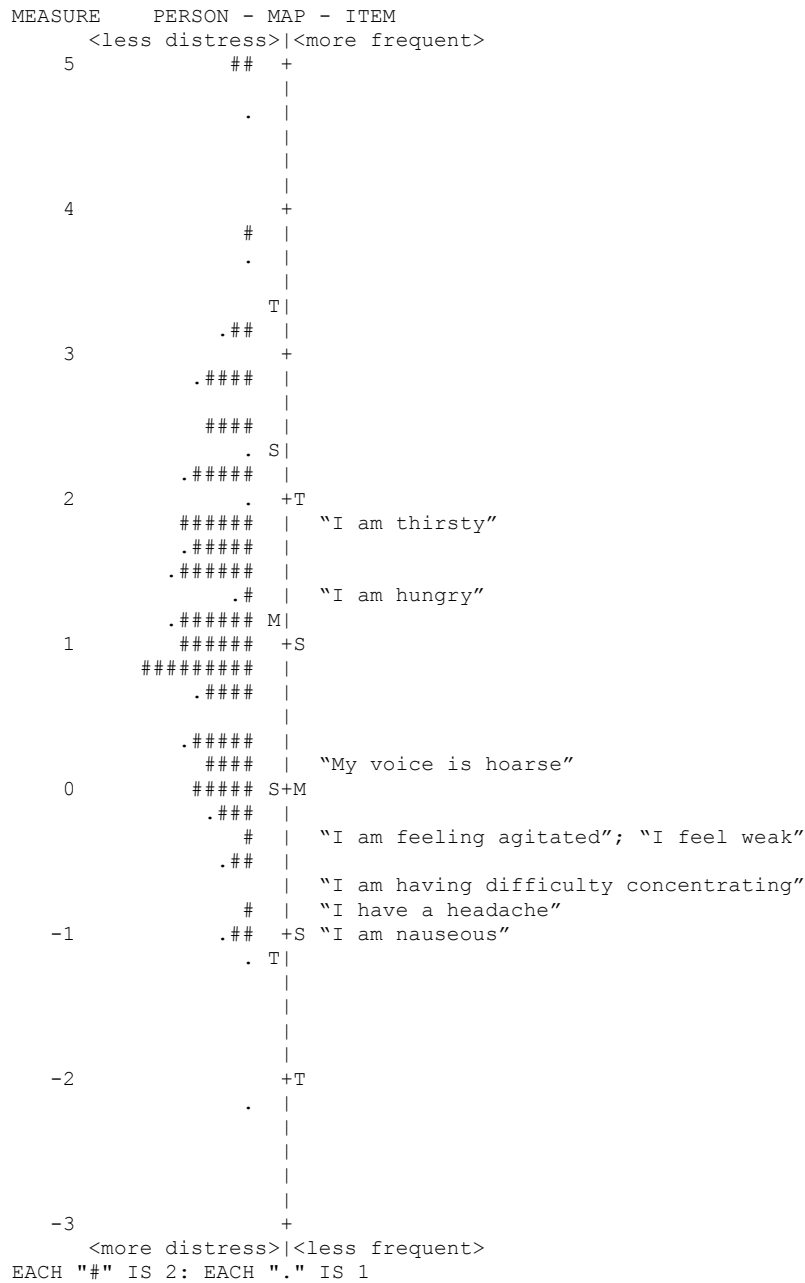

Supplement: Supplementary file 2 [file 1]
