# Supplementary material
Source: publisher figshare collection journal article supplement (https://tandf.figshare.com/articles/dataset/_/13272872)
Supplement: Supplementary file 3 [file 1]

**eFigure 1: Demographic, Satisfaction, Validity and Reliability Questionnaire**

**Preoperative Fasting for Ambulatory Cataract Surgery: A Time-Interrupted Prospective Study (The PRACTICE Study)**

Thank you for your willingness and interest to participate in our study. As part of the study, we ask you to spend 3-5 minutes answering the following questions. If you have any questions or concerns, please do not hesitate to ask our team.

**Demographics**

1. Date: \_\_\_\_\_
2. Patient Number: \_\_\_\_\_
3. Age: \_\_\_\_\_
4. Gender: \_\_\_\_\_
5. Left or Right Eye: \_\_\_\_\_
6. First or Second Eye: \_\_\_\_\_
7. Diabetic?      Yes      No
  - i. If diabetic, do you use insulin?      Yes      No
8. Surgeon: \_\_\_\_\_
9. Scheduled Surgery Time (HH:MM): \_\_\_\_\_
10. Fasting Time – Solids (hours): \_\_\_\_\_
11. Fasting Time – Clear Liquids (hours): \_\_\_\_\_
12. Solid Foods Eaten in last 24 Hours (Relative to Typical Intake):
  - A) Much Less than Typical    B) Less than Typical    C) Typical
  - D) More than Typical    E) Much More than Typical
13. Liquids Drank in last 24 Hours (Relative to Typical Intake):
  - A) Much Less than Typical    B) Less than Typical    C) Typical
  - D) More than Typical    E) Much More than Typical

## **Satisfaction Questionnaire**

Please circle the statement that describes you best at the current time.

- 1) "I am hungry".  
A) Strongly Agree   B) Agree   C) Neutral   D) Disagree   E) Strongly Disagree
- 2) "I am thirsty".  
A) Strongly Agree   B) Agree   C) Neutral   D) Disagree   E) Strongly Disagree
- 3) "My voice is hoarse".  
A) Strongly Agree   B) Agree   C) Neutral   D) Disagree   E) Strongly Disagree
- 4) "I am in pain".  
A) Strongly Agree   B) Agree   C) Neutral   D) Disagree   E) Strongly Disagree
- 5) "I feel weak".  
A) Strongly Agree   B) Agree   C) Neutral   D) Disagree   E) Strongly Disagree
- 6) "I am feeling agitated because of having to fast".  
A) Strongly Agree   B) Agree   C) Neutral   D) Disagree   E) Strongly Disagree
- 7) "I am feeling anxious because of having to fast".  
A) Strongly Agree   B) Agree   C) Neutral   D) Disagree   E) Strongly Disagree
- 8) "I am nauseous".  
A) Strongly Agree   B) Agree   C) Neutral   D) Disagree   E) Strongly Disagree
- 9) "I have recently vomited".  
A) Strongly Agree   B) Agree   C) Neutral   D) Disagree   E) Strongly Disagree  
If yes, how many vomiting episodes over the last 24 hours? \_\_\_\_\_
- 10) "I am shivering".  
A) Strongly Agree   B) Agree   C) Neutral   D) Disagree   E) Strongly Disagree
- 11) "I am having difficulty concentrating".  
A) Strongly Agree   B) Agree   C) Neutral   D) Disagree   E) Strongly Disagree
- 12) "I have a headache".  
A) Strongly Agree   B) Agree   C) Neutral   D) Disagree   E) Strongly Disagree
- 13) "I am feeling lightheaded or dizzy".  
A) Strongly Agree   B) Agree   C) Neutral   D) Disagree   E) Strongly Disagree

### **Validity and Reliability Indicators**

- 1) How well do you think the questionnaire above measures the distress or burden associated with fasting before cataract surgery?  
A) Extremely Well   B) Well   C) Neutral   D) Not Well   E) Extremely Not Well
- 2) Was there any question on the questionnaire above that did **not** measure the distress or burden associated with fasting before cataract surgery?  
A) Yes (Which question? Please explain: \_\_\_\_\_)   B) No
- 3) Was there any question on the questionnaire that was **not** clear, relevant, simple to answer or consistent with other items?  
A) Yes (Which question? Please explain: \_\_\_\_\_)   B) No
- 4) Is there any question that is currently not in the questionnaire which should be included?  
A) Yes (Please explain: \_\_\_\_\_)   B) No

### **Secondary Endpoints (Completed by Research Assistant)**

- 1) Please document if aspiration occurred postoperatively: \_\_\_\_\_
- 2) Please document if the surgery was cancelled due to NPO requirement violation:  
\_\_\_\_\_
